# Supplementary material for: Anthranilic acid-based inhibitors of phosphodiesterase: Design, synthesis, and bioactive evaluation
Source: Royal Society of Chemistry journal article supplement (doi:10.1039/c1ob05714f), 2011-01-01
Supplement: c1ob05714f.pdf [file c1ob05714f.pdf]

## **Anthranilic acid-Based Inhibitors of Phosphodiesterase: Design, Synthesis, and Bioactive Evaluation**

*Yih-Dih Cheng,<sup>†,‡,§</sup> Tsong-Long Hwang,<sup>†,§</sup> Han-Hsiang Wang,<sup>†</sup> Wen-Yi Chang,<sup>†</sup> Yi-Ting Liu,<sup>†</sup>  
Pei-Wen Hsieh<sup>†,\*</sup>*

Graduate Institute of Natural Products, Chang Gung University, Taoyuan 333, Taiwan; Chang Gung  
Memorial Hospital, Chia-Yi 613, Taiwan

\*Corresponding authors. P.W.H. Tel: +886-3-211-8800, ext. 3105. Fax: +886-3-211-8643. E-mail:  
[pewehs@mail.cgu.edu.tw](mailto:pewehs@mail.cgu.edu.tw).

## **Supporting Information**

### **Contents:**

HPLC analysis of the target compounds.

## HPLC analysis of the final compounds.

Compound purities were determined by two diverse HPLC conditions.

### HPLC conditions No.1:

System: Jasco PU-1580 intelligent HPLC PUMP,

Jasco AS-1555-10 intelligent sampler

Detector: Jasco UV-Vis detector, 248 nm

Column: Ascentis<sup>®</sup> C-18 (SUPELCU<sup>™</sup> analytical), 5µm, 4.6 mm x 250 mm

Mobile phase: 75% MeCN

Mode: Isocratic system

Flow rate: 1 mL / min

### HPLC conditions No.2:

System: Jasco PU-1580 intelligent HPLC PUMP,

Jasco AS-1555-10 intelligent sampler

Detector: Jasco UV-Vis detector, 248 nm

Column: Ascentis<sup>®</sup> C-18 (SUPELCU<sup>™</sup> analytical), 5µm, 4.6 mm x 250 mm

Mobile phase: A: 80% MeOH

Mode: Isocratic system

Flow rate: 1 mL / min

## HPLC analysis of the final compounds

| HPLC condition No.1 |                         |                    |           |                         |                    |
|---------------------|-------------------------|--------------------|-----------|-------------------------|--------------------|
| Compounds           | Retention time<br>(min) | Purity<br>(area %) | Compounds | Retention<br>time (min) | Purity<br>(area %) |
| <b>8</b>            | 8.8                     | 98.8               | <b>32</b> | 6.2                     | 98.8               |
| <b>9</b>            | 9.0                     | 99.8               | <b>33</b> | 7.4                     | 99.4               |
| <b>10</b>           | 12.0                    | 99.5               | <b>34</b> | 7.7                     | 99.4               |
| <b>11</b>           | 11.6                    | 99.2               | <b>35</b> | 8.0                     | 99.7               |
| <b>12</b>           | 11.9                    | 99.8               | <b>36</b> | 9.7                     | 99.6               |
| <b>13</b>           | 16.3                    | 99.4               | <b>37</b> | 10.1                    | 99.7               |
| <b>14</b>           | 16.1                    | 99.7               | <b>40</b> | 5.7                     | 98.5               |
| <b>15</b>           | 16.4                    | 99.8               | <b>41</b> | 6.9                     | 99.3               |
| <b>16</b>           | 5.7                     | 99.9               | <b>42</b> | 7.3                     | 96.5               |
| <b>17</b>           | 7.4                     | 99.8               | <b>43</b> | 7.5                     | 99.7               |
| <b>18</b>           | 9.8                     | 99.7               | <b>44</b> | 9.2                     | 99.8               |
| <b>19</b>           | 3.6                     | 98.1               | <b>45</b> | 9.7                     | 99.4               |
| <b>20</b>           | 4.1                     | 99.8               | <b>46</b> | 10.0                    | 99.1               |
| <b>21</b>           | 4.9                     | 99.4               | <b>47</b> | 12.6                    | 99.6               |
| <b>22</b>           | 3.5                     | 98.8               | <b>48</b> | 13.3                    | 99.3               |
| <b>23</b>           | 5.1                     | 99.1               | <b>49</b> | 13.5                    | 99.4               |
| <b>24</b>           | 3.7                     | 98.4               | <b>50</b> | 17.2                    | 99.8               |
| <b>25</b>           | 3.8                     | 99.3               | <b>51</b> | 18.3                    | 99.4               |
| <b>26</b>           | 2.8                     | 99.2               | <b>52</b> | 9.5                     | 99.4               |
| <b>27</b>           | 5.5                     | 99.4               | <b>53</b> | 12.8                    | 99.6               |
| <b>29</b>           | 5.0                     | 99.5               | <b>54</b> | 14.0                    | 99.7               |
| <b>30</b>           | 5.8                     | 99.5               | <b>56</b> | 11.8                    | 99.0               |
| <b>31</b>           | 6.0                     | 98.7               | <b>58</b> | 15.0                    | 98.0               |

| HPLC condition No.2 |                      |                 |           |                      |                 |
|---------------------|----------------------|-----------------|-----------|----------------------|-----------------|
| Compounds           | Retention time (min) | Purity (area %) | Compounds | Retention time (min) | Purity (area %) |
| <b>8</b>            | 8.4                  | 98.0            | <b>32</b> | 4.9                  | 99.8            |
| <b>9</b>            | 8.3                  | 96.1            | <b>33</b> | 5.9                  | 99.3            |
| <b>10</b>           | 13.0                 | 99.1            | <b>34</b> | 6.2                  | 99.0            |
| <b>11</b>           | 11.3                 | 96.6            | <b>35</b> | 6.2                  | 99.1            |
| <b>12</b>           | 11.4                 | 96.1            | <b>36</b> | 7.6                  | 97.0            |
| <b>13</b>           | 18.7                 | 97.8            | <b>37</b> | 8.2                  | 96.8            |
| <b>14</b>           | 16.1                 | 97.8            | <b>40</b> | 6.0                  | 99.8            |
| <b>15</b>           | 16.2                 | 99.4            | <b>41</b> | 7.4                  | 97.3            |
| <b>16</b>           | 5.1                  | 96.6            | <b>42</b> | 7.8                  | 96.5            |
| <b>17</b>           | 6.7                  | 99.4            | <b>43</b> | 8.0                  | 99.6            |
| <b>18</b>           | 9.0                  | 98.9            | <b>44</b> | 9.9                  | 99.6            |
| <b>19</b>           | 3.2                  | 99.3            | <b>45</b> | 10.6                 | 99.3            |
| <b>20</b>           | 3.5                  | 99.4            | <b>46</b> | 11.0                 | 98.8            |
| <b>21</b>           | 4.1                  | 97.3            | <b>47</b> | 14.0                 | 97.2            |
| <b>22</b>           | 3.9                  | 96.2            | <b>48</b> | 14.9                 | 99.3            |
| <b>23</b>           | 6.6                  | 99.7            | <b>49</b> | 15.0                 | 97.3            |
| <b>24</b>           | 3.8                  | 96.8            | <b>50</b> | 19.3                 | 97.8            |
| <b>25</b>           | 3.9                  | 99.7            | <b>51</b> | 21.7                 | 98.4            |
| <b>26</b>           | 3.0                  | 99.6            | <b>52</b> | 10.6                 | 97.6            |
| <b>27</b>           | 5.1                  | 96.0            | <b>53</b> | 14.8                 | 97.1            |
| <b>29</b>           | 4.7                  | 99.2            | <b>54</b> | 16.4                 | 98.1            |
| <b>30</b>           | 4.0                  | 99.2            | <b>56</b> | 13.6                 | 97.8            |
| <b>31</b>           | 4.9                  | 98.0            | <b>58</b> | 17.0                 | 97.5            |
